# Supplementary material
Source: Springer Nature journal article supplement (https://www.springermedizin.de/resource/supplementary/12993_2009_265_MOESM3_ESM.pdf/9617424)

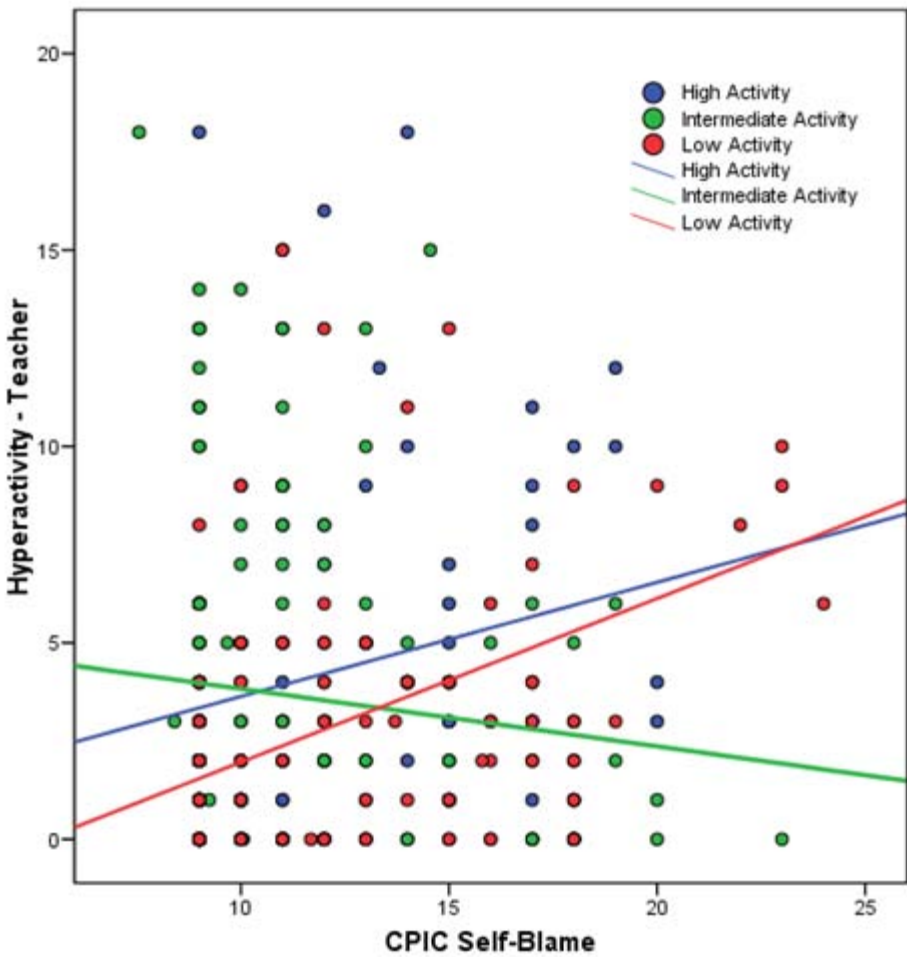

Supplement: MOESM3 [file 9617424]
